# Supplementary material for: Public Acceptance of Driverless Buses in China: An Empirical Analysis Based on an Extended UTAUT Model
Source: Hindawi journal article supplement (doi:10.1155/2020/4318182), 2020-11-11
Supplement: f1 [file 4318182.f1.pdf]

# Questionnaire on public acceptance of driverless buses

Dear Mr./Ms.,

Thank you very much for taking the time to participate in this survey on the public acceptance of driverless buses. Please tick the box that matches your personal information or psychological state on the content described. All data collected in this survey will only be used for academic research, and your personal information will remain confidential.

Best regards!

## Introduction:

The driverless bus is a new type of intelligent bus that can learn the surrounding road environment through numerous on-board sensors, as well as automatically control the vehicle steering and driving speed through the automated driving system. Road tests of driverless buses have already been initiated in many countries, including China. The Alphabus in Shenzhen and the Apolong of Baidu are typical examples of China's driverless buses. Below are some pictures related to the appearance, internal space, and actual operating status of the Alphabus and Apolong, to help you create a more intuitive feeling of driverless buses.

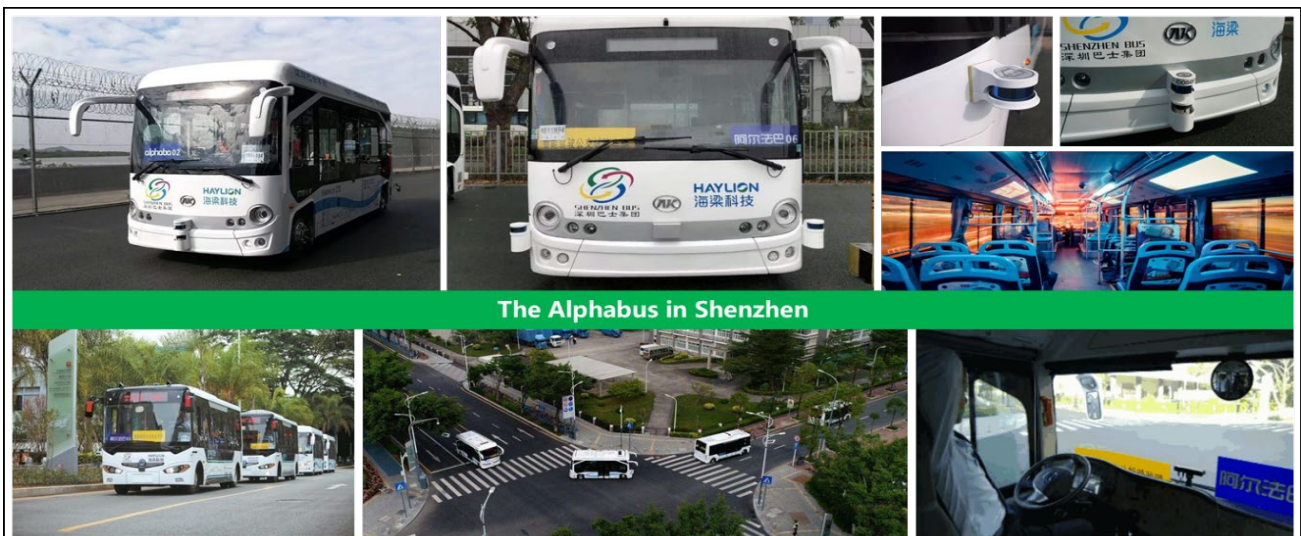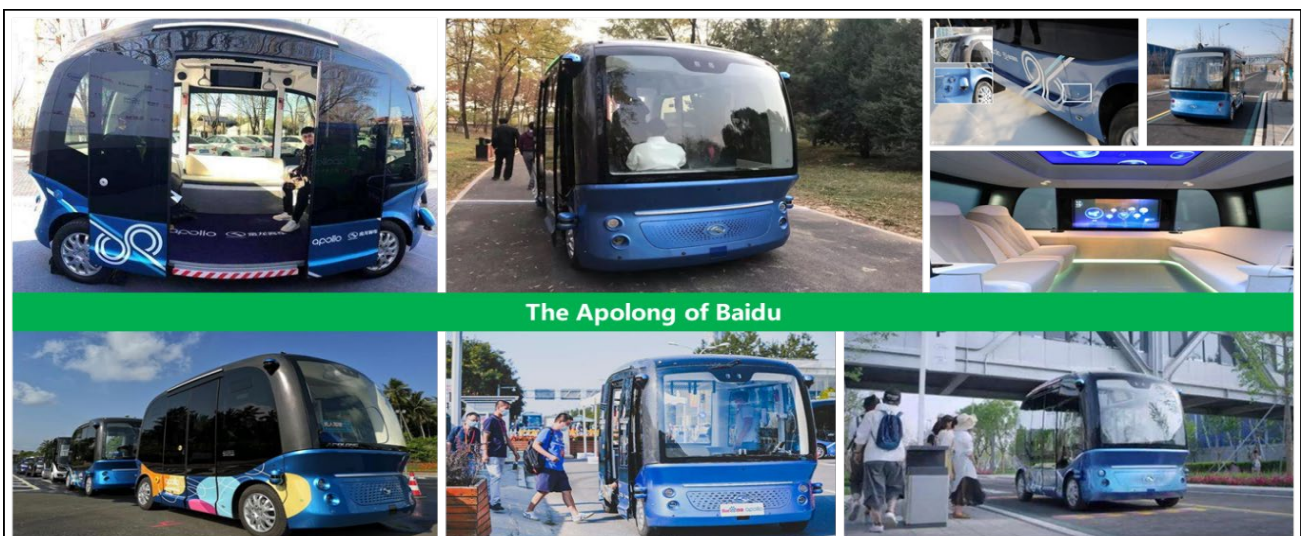

## Part 1 Personal information

### 1. Gender:

- Male  Female

### 2. Age:

- <18  18-25  26-40  41-60  >60

### 3. Education Level:

- High school and below  College degree  
 Bachelor's degree  Master's degree and above

## Part 2 A measurement scale for the public's subjective perceptions of driverless buses

### 1. Test ride locations for driverless buses will be easy to find.

- Strongly disagree  Disagree  Disagree somewhat  Neither agree nor disagree  
 Agree somewhat  Agree  Strongly agree

### 2. The payment methods for taking driverless buses will be straightforward.

- Strongly disagree  Disagree  Disagree somewhat  Neither agree nor disagree  
 Agree somewhat  Agree  Strongly agree

### 3. I will soon become familiar with and accustomed to taking driverless buses.

- Strongly disagree  Disagree  Disagree somewhat  Neither agree nor disagree  
 Agree somewhat  Agree  Strongly agree

### 4. Driverless buses can reduce traffic congestion, thereby shortening the riding time.

- Strongly disagree  Disagree  Disagree somewhat  Neither agree nor disagree  
 Agree somewhat  Agree  Strongly agree

### 5. Driverless buses can reduce traffic accidents.

- Strongly disagree  Disagree  Disagree somewhat  Neither agree nor disagree  
 Agree somewhat  Agree  Strongly agree

### 6. Driverless buses can improve the efficiency and quality of my study, work, and life.

- Strongly disagree  Disagree  Disagree somewhat  Neither agree nor disagree  
 Agree somewhat  Agree  Strongly agree

### 7. If relatives and friends around me are taking driverless buses, I will follow along.

- Strongly disagree  Disagree  Disagree somewhat  Neither agree nor disagree  
 Agree somewhat  Agree  Strongly agree

### 8. If colleagues around me are taking driverless buses, I will follow along.

- Strongly disagree  Disagree  Disagree somewhat  Neither agree nor disagree  
 Agree somewhat  Agree  Strongly agree

### 9. Propaganda and guidance from the media will convince me to take the driverless bus.

- Strongly disagree  Disagree  Disagree somewhat  Neither agree nor disagree  
 Agree somewhat  Agree  Strongly agree

**10. Taking the driverless bus will give me more conversation starters in social activities, thereby enhancing my social image.**

- Strongly disagree    Disagree    Disagree somewhat    Neither agree nor disagree  
 Agree somewhat    Agree    Strongly agree

**11. Driverless buses have received much policy support.**

- Strongly disagree    Disagree    Disagree somewhat    Neither agree nor disagree  
 Agree somewhat    Agree    Strongly agree

**12. Related management technologies can support driverless bus operations.**

- Strongly disagree    Disagree    Disagree somewhat    Neither agree nor disagree  
 Agree somewhat    Agree    Strongly agree

**13. I already have the knowledge needed to ride a driverless bus.**

- Strongly disagree    Disagree    Disagree somewhat    Neither agree nor disagree  
 Agree somewhat    Agree    Strongly agree

**14. I often pay attention to the development trend of driverless buses.**

- Strongly disagree    Disagree    Disagree somewhat    Neither agree nor disagree  
 Agree somewhat    Agree    Strongly agree

**15. I am willing to try new technology products and services.**

- Strongly disagree    Disagree    Disagree somewhat    Neither agree nor disagree  
 Agree somewhat    Agree    Strongly agree

**16. I am often the first to use emerging technology products or services among my acquaintances.**

- Strongly disagree    Disagree    Disagree somewhat    Neither agree nor disagree  
 Agree somewhat    Agree    Strongly agree

**17. I am good at exploring and trying new things.**

- Strongly disagree    Disagree    Disagree somewhat    Neither agree nor disagree  
 Agree somewhat    Agree    Strongly agree

**18. I think the speed of driverless buses is not fast enough, which will affect my travel time.**

- Strongly disagree    Disagree    Disagree somewhat    Neither agree nor disagree  
 Agree somewhat    Agree    Strongly agree

**19. I am concerned that driverless buses will cost more than traditional buses.**

- Strongly disagree    Disagree    Disagree somewhat    Neither agree nor disagree  
 Agree somewhat    Agree    Strongly agree

**20. I am concerned that the functional design of driverless buses is still not perfect today.**

- Strongly disagree    Disagree    Disagree somewhat    Neither agree nor disagree  
 Agree somewhat    Agree    Strongly agree

**21. I am concerned about being persecuted by others in the driverless buses.**

- Strongly disagree    Disagree    Disagree somewhat    Neither agree nor disagree  
 Agree somewhat    Agree    Strongly agree

**22. I am concerned that the safety performance of driverless buses is not guaranteed.**

- Strongly disagree    Disagree    Disagree somewhat    Neither agree nor disagree  
 Agree somewhat    Agree    Strongly agree

**23. I am concerned that driverless buses will conflict and interfere with human-driven vehicles.**

- Strongly disagree    Disagree    Disagree somewhat    Neither agree nor disagree  
 Agree somewhat    Agree    Strongly agree

**24. I will take the driverless bus when the technology is mature in the future.**

- Strongly disagree    Disagree    Disagree somewhat    Neither agree nor disagree  
 Agree somewhat    Agree    Strongly agree

**25. I will take driverless buses often in the future.**

- Strongly disagree    Disagree    Disagree somewhat    Neither agree nor disagree  
 Agree somewhat    Agree    Strongly agree

**26. I would highly recommend taking driverless buses to my relatives and friends.**

- Strongly disagree    Disagree    Disagree somewhat    Neither agree nor disagree  
 Agree somewhat    Agree    Strongly agree
